# Supplementary material
Source: publisher figshare collection journal article supplement (https://karger.figshare.com/ndownloader/files/38302839)

**Supplementary Fig. S1** Model Projection of optimal condition


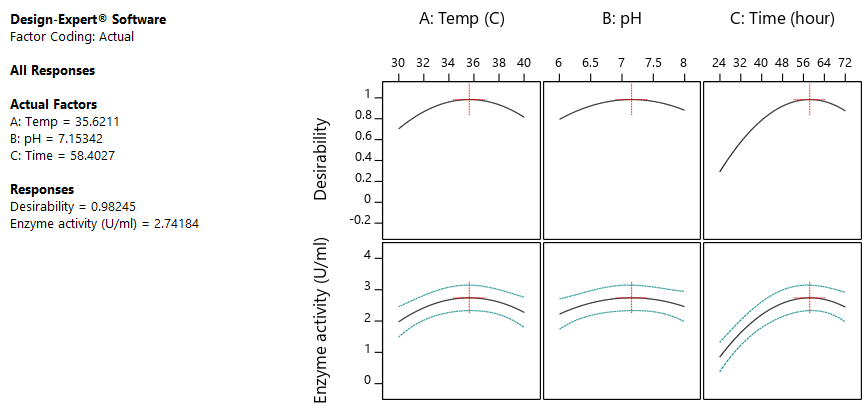


**Supplementary Fig. S2** Effects of different fermentation media for pectinase activity (different lowercase letters above the bar indicate the significant difference between media used)


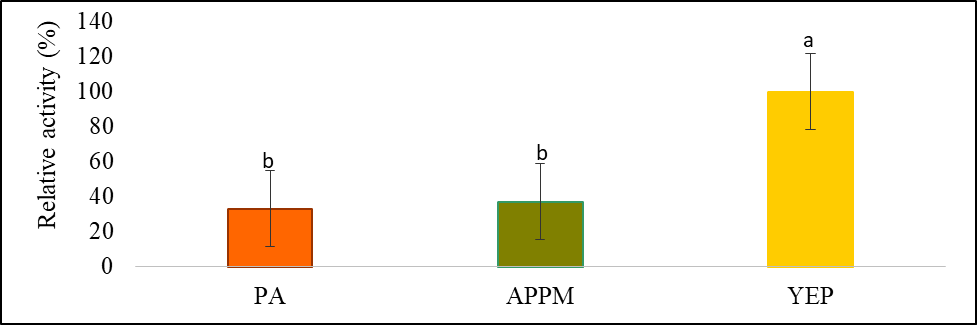

Supplement: Supplementary file 1 [file 38302839]
